# Supplementary material for: Trauma-Informed Approaches in Primary Healthcare and Community Mental Healthcare: A Mixed Methods Systematic Review of Organisational Change Interventions
Source: Hindawi journal article supplement (doi:10.1155/2023/4475114), 2023-05-11
Supplement: f1 [file 4475114.f1.zip]

Archive with 6 entries (6 files):
- Supplementary material S1.docx
- Supplementary material S2.docx
- Supplementary material S3.docx
- Supplementary material S4.docx
- Supplementary material S5.docx
- Supplementary material S6.docx
