# Supplementary material for: Trauma-Informed Approaches in Primary Healthcare and Community Mental Healthcare: A Mixed Methods Systematic Review of Organisational Change Interventions
Source: Hindawi journal article supplement (doi:10.1155/2023/4475114), 2023-05-11
Supplement: f1 [file 4475114.f1.zip › Supplementary material S1.docx]

# **Supplementary material S1**

Table S1. Trauma-informed approach at the organisation level: definitions and core components

| **Year**  **Authors**  **Document** | **Definition of trauma** | **Definition of trauma-informed approach** | **Assumptions** | **Philosophy and principles** | **Implementation domains** |
| --- | --- | --- | --- | --- | --- |
| 2001. Harris and Fallot [7]  Using trauma theory to design service systems | Current or past sexual or physical abuse trauma. Trauma is not a single discrete event but rather an organising experience that forms the core of the individual’s identity. | Trauma-informed services are not designed to treat symptoms or syndromes related to sexual or physical abuse. Regardless of their primary mission their commitment is to provide services in a manner that is welcoming and appropriate to the special needs of trauma survivors. | 1. To know the history of past and current abuse  2. To understand the impact of violence and victimization  3. Accommodate the vulnerabilities of trauma survivors  4. Facilitate consumer participation in treatment  5. Avoid retraumatising and revictimizing consumers | Paradigm shift within service delivery systems:  1. Understanding the impact of trauma  2. Holistic approach  3. Strength-based approach to prevent problematic behaviour  4. Collaborative clinical decision making  5. Open and genuine collaboration between providers  6. Trust and safety | Certain conditions need to be in place for a trauma-informed system to be established. Those conditions reflect the structure and culture of the organisation, and they predate any actual changes in clinical services:  1. Administrative commitment to change  2. Training and education for all staff  3. Sensitive hiring practices  4. Review of policies and procedures  5. Universal screening, trauma assessment |
| 2014. Substance Abuse and Mental Health Services Administration (SAMHSA), US [8]  SAMHSA’s concept of trauma and guidance for a trauma-informed approach | Individual trauma results from an **event**, series of events, or set of circumstances that is **experienced** by an individual as physically or emotionally harmful or life threatening and that has lasting adverse **effects** on the individual’s functioning and mental, physical, social, emotional, or spiritual well-being. | A strength-based service delivery approach that is grounded in an understanding of and responsiveness to the impact of trauma, that emphasise physical, psychological, and emotional safety for both providers and survivors, and that creates opportunities for survivors to rebuild a sense of control and empowerment. | The *four Rs*:  1. Realisation of the impact of trauma and understanding paths to recovery  2. Recognition of signs and symptoms of trauma  3. Response by integrating knowledge about trauma into policies, procedures, and practices  4. Resist re-traumatisation. | 1. Safety  2. Trustworthiness and transparency  3. Peer support  4. Collaboration and mutuality  5. Empowerment, voice, and choice  6. Cultural, historical, and gender sensitivity | 1. Governance and leadership  2. Policy  3. Physical environments  4. Engagement and involvement  5. Cross sector collaboration  6. Screening, assessment, treatment services  7. Training and workforce development  8. Progress monitoring and quality assurance  9. Financing  10. Evaluation |
| 2017. NHS Education for Scotland and Scottish Government, UK [11]  NHS Education for Scotland. Transforming psychological trauma: a knowledge and skills framework for the Scottish workforce | SAMHSA definition | The Transforming Psychological Trauma framework | 1. Recognises prevalence and impact of trauma  2. Respond  3. Prevent re-traumatisation | 1. Safety  2. Choice  3. Collaboration  4. Trust  5. Capacity-strengthening approach  6. Acknowledges rights  7. Access to treatment | 1. Training for all workforce  2. Staff well-being |
| 2017. Centre for Health Care Strategies, Inc., US [10]  What is trauma-informed care? | SAMHSA definition. Examples of trauma include physical, sexual, and emotional abuse, childhood neglect, having a family member with mental health or substance abuse disorder, violence in the community and poverty and systemic discrimination. | SAMHSA definition. | The SAMHSA *four Rs* | 1. Patient empowerment  2. Choice  3. Collaboration  4. Safety  5. Trustworthiness | Organisational reform precedes the adoption of trauma-informed clinical practices.  1. Leading and communication about the transformation  2. Engaging patients in organisational planning  3. Training clinical and non-clinical staff  4. Creating safe environment  5. Preventing secondary traumatic stress in staff  6. Hiring a trauma-informed workforce  Clinical practices:  7. Involving patients in the treatment process  8. Screening for trauma  9. Training staff in trauma-specific treatment approaches  10. Engaging referral services and partnering organisations |
| 2018. The Women’s Mental Health Taskforce, UK [4]  The Women's Mental Health Taskforce. Final report | Violence, abuse, poverty, and inequality. | Gender- and trauma-informed approach  refers to an approach by which organisations operate with an awareness of trauma and its impact and avoid re-traumatisation | 1. Recognise the impact of trauma  2. Avoid re-traumatisation for staff or service users  3. Identify recovery from trauma as a primary goal | 1. Whole organisation approach  2. Equal access  3. Recognition and response to violence and trauma  4. Respectful, compassionate, trustful relationships  5. Safety  6. Engagement of service users  7. Capacity- strengthening, empowering approach  8. Holistic approach  9. Gender-informed approach. | Not reported |
| 2018. Public Health Agency of Canada [12]  Trauma and violence-informed approaches to policy and practice | Trauma-informed approaches are familiar to many organizations and service providers. Recently, this term has been expanded to include "and violence", an important change in the language which underscores the connections between trauma and violence | Trauma and violence-informed approaches are policies and practices that recognize the connections between violence, trauma, negative health outcomes and behaviours. These approaches increase safety, control and resilience for people who are seeking services in relation to experiences of violence and/or have a history of experiencing violence | Recognise connections between violence, trauma, behaviour, health | 1. Understand trauma and violence, and their impacts on peoples' lives and behaviours  2. Create emotionally and physically safe environments  3. Foster opportunities for choice, collaboration, and connection  4. Provide a strengths-based and capacity-building approach to support client coping and resilience | 1. Policies and practices  2. Environments |
| 2019. Gerber [9]  Trauma-informed healthcare approaches: a guide for primary care | SAMHSA definition of individual trauma, complex trauma, historical trauma, structural violence. | SAMHSA definition  Trauma-informed systems of care strive to become vicarious trauma-informed by attending pro-actively and compassionately to the vicarious trauma of healthcare providers and staff. | Not reported | SAMHSA principles  AND  *Four Cs* of clinical care:  1. Calm  2. Contain  3. Care  4. Cope (p. 33) | Not reported |
| 2021. NHS England and NHS Improvement, UK [13]  A good practice guide to support implementation of trauma-informed care in the perinatal period | SAMHSA definition | SAMHSA definition | Not reported | 1. Compassion and recognition  2. Communication and collaboration  3. Consistency and continuity  4. Recognising diversity and facilitating recovery | 1. Leading and communicating change  2. Staff training  3. Supervision and peer support  4. Co-production and service co-design  Evaluation and culture of improvement |

Note. SAMHSA, the Substance Abuse and Mental Health Services Administration is a branch of the U.S. Department of Health and Human Services. US, United States. UK, United Kingdom. NHS, National Health Service.
