# Supplementary material for: Trauma-Informed Approaches in Primary Healthcare and Community Mental Healthcare: A Mixed Methods Systematic Review of Organisational Change Interventions
Source: Hindawi journal article supplement (doi:10.1155/2023/4475114), 2023-05-11
Supplement: f1 [file 4475114.f1.zip › Supplementary material S2.docx]

**Supplementary material S2**

Example search strategy

Database: Ovid MEDLINE(R) 1946 to present

| **#** | **Searches** | **Results** |
| --- | --- | --- |
| 1 | (trauma inform* or trauma-inform* or trauma focus* or trauma-focus* or trauma responsive* or trauma sensitive or trauma-sensitive or trauma services or complex trauma or trauma-base* or trauma base*).ab,ti. | 3556 |
| 2 | (trauma-inform* and (approach* or care or practi? or intervention* or system*)).ab,ti. | 1185 |
| 3 | (trauma-inform* and (measure or survey or questionnaire or checklist or assessment or evaluation)).ab,ti. | 445 |
| 4 | or/1-3 | 3556 |
| 5 | (adverse childhood event$ or adverse childhood experience$ or psychological* informed environment$).ab,ti. | 2404 |
| 6 | 4 or 5 | 5800 |
| 7 | (child or child* or children).mp. | 2538736 |
| 8 | child/ or children/ or infant/ or adolescent/ | 3288214 |
| 9 | or/7-8 | 3801413 |
| 10 | 6 not 9 | 1932 |
