# Supplementary material for: Trauma-Informed Approaches in Primary Healthcare and Community Mental Healthcare: A Mixed Methods Systematic Review of Organisational Change Interventions
Source: Hindawi journal article supplement (doi:10.1155/2023/4475114), 2023-05-11
Supplement: f1 [file 4475114.f1.zip › Supplementary material S3.docx]

**Supplementary material S3**

Table S3. Models of included trauma-informed organisational change interventions in primary care and community mental healthcare

| **SAMHSA Implementation domains [8]** | **Women, Co-occurring Disorders, and Violence Study,** McHugo 2005  [47, 52, 53] | **Equipping Primary Health Care for Equity (EQUIP) model,** Browne 2018 [45, 46, 49, 51] | **Aspire to Realize Improved Safety and Equity (ARISE) quality improvement programme,** Kimberg 2019 [50] | **Advancing Trauma Informed Care initiative,**  Dubay 2018 [48] | | | | | **Trauma-informed Young**  **Women’s Clinic,** Brooks 2017 [42-44] | **One-stop-shop Women’s Centre (Trauma-informed service system model),** Bradley 2020 [41] | **Interventions models (n=8)** |
| --- | --- | --- | --- | --- | --- | --- | --- | --- | --- | --- | --- |
| **Women’s HIV Clinic (Trauma-informed Primary Care model)** | | **Montefiore Medical Group** | **Family Health Services (Sanctuary model)** | |
| **1. Governance and leadership** | Not reported | Engagement of clinical/administrative leaders/managers in consultations with clinicians and other staff to conduct local needs assessment, select 3-5 priorities, and develop plan for addressing each priority. | The quality improvement team includes the Director of Primary Care, Behavioural Health, the Primary Care Director of Population Health and Quality, the quality improvement coordinator, and senior clinicians. | Not reported | | Not reported | Complies with the Sanctuary Model certification. Steering Committee, monthly meetings open to all staff. | | Organisation mission statement reflects a social model of health care and includes commitment to providing trauma-informed care. | Organisation mission statement includes commitment to providing trauma-informed care. | **5** |
| **2. Written policies and procedures** | Not reported | New harm reduction policies and practices for supporting patients with substance use issues. | System-wide quality improvement priorities, aligned with state and national performance metrics and associated incentives for depression and alcohol/substance use.  Standardise, team-based workflow.  Screening and response protocols. | Not reported | | Not reported | Not reported | | Written policy recognises impact of gender-based violence, promotes women’s role in service delivery, commitment to staff development | Not reported | **3** |
| **3. Physical environment** | Women only space. | Removed sign ‘Check in or you will lose your appointment’ from the reception desk.  Opened clinic doors 30 min earlier so that patients could wait indoors to book appointments.  Repurposed a section of the waiting room to create a child-friendly space for patients with small children. | Not reported | Redesigned waiting room to be more calming for staff and patients.  Chair sessions with massage therapist for patients.  Service dog for patients to pet.  Free food for patients.  colouring pages.  Calming music. | | Waiting room posters about the importance of behavioural health treatment for traumatic experiences | Natural light in many rooms.  Open space. | | Women only space.  Located in an older house in the community.  Comfortable furniture.  Service users’ art and posters affirming women’s rights.  Consultation length is tailored to patient needs.  Childcare during clinic activities. | Women only space.  Female only staff.  Variety of services in one location.  Fully staffed creche for childcare during activities.  Non-clinical reception and waiting area.  Open safe space.  Empowering and motivational quotes, bright paintings.  Light and comfortable room for group work.  Physical environment is regularly assessed through ‘walk-throughs’ and reflective practices. | **7** |
| **4. Engagement and involvement of people with lived experience** | Service users and  HCP with lived experience helped design and/or deliver trauma-specific interventions. Sourcebook for developing partnerships between HCPs and people with lived experience. | Hired and integrated an Indigenous Elder to participate in clinic activities. | Patient advisory board.  Educational message on the screening tool to precede the questions and a checklist of coping behaviours and resilience factors to facilitate patient-centred conversations about preferred treatment. | Stakeholder group including four patients and representatives from each department meets monthly. The group provides feedback, helps design and implement organisational change. | | Not reported | Not reported | | Person-centred care.  Shared decision making. | Lived experience panels and forums. Recruit staff with lived experience.  Varied activities, food sharing, creative projects. | **6** |
| **5. Cross sector collaboration** | Linkages across agencies, all services were comprehensive, integrated, and trauma informed. | Developed new working relationship with the local Indigenous community. | Formalised partnerships with a community-based domestic violence agency, a legal aid organisation, a trauma-specific treatment organisation, and a national non-profit violence prevention resource centre. | Partnerships. | | Not reported | Not reported | | Referrals from the local high school and other services supporting young people experiencing adversity.  Partnership with community youth-oriented services. | Engaged with local partnerships and companies to improve service and supplies for women.  Collaborative partners are trauma-informed. | **6** |
| **6. Screening, assessment, treatment services** | Screening, assessment. Simultaneous and coordinated provision of substance abuse, mental health, and trauma services.  On-site trauma-specific group intervention TREM (Trauma Recovery and Empowerment Model).  Peer groups, advocates, facilitators, drop-in clinic. | Integrated trauma- and violence-informed approaches into the routine provision of care.  Chronic pain group. | Screening all patients concurrently for depression, alcohol/substance use and interpersonal violence.  Single screening tool and pathway for depression, alcohol/substance use, and interpersonal violence.  On-site cognitive behavioural interventions and interpersonal violence advocate.  Referrals to mental health and substance abuse services in the community. | Screening for interpersonal violence, PTSD, substance abuse, chronic pain.  On- and off-site psychosocial services.  Collocate a licensed clinical social worker to offer on-site therapy.  Group intervention on skill building for patients who aren’t ready for traditional talk therapy. | | Screening for adverse childhood experiences.  On-site behavioural health counsellors. | On-site talking therapy, creative art therapies.  On-site social workers, behaviour health counsellors, nutritionist, fitness centre, yoga and mindfulness classes for patients. | | Drop-in appointments with a nurse, counsellor, and general practitioner.  Trauma-sensitive gynaecological care.  Drop-in facilitated art group with  peer facilitators. | Universal screening for histories of trauma.  On-site drop-in support, one to one support, well-being groups, trauma-specific interventions, tailored rehabilitation support. | **8** |
| **7. Training and workforce development** | Community support specialists trained in trauma, mental health, and substance abuse. | All staff training: 2-and 8-hour workshops, online 8-hour self-directed programme.  Strategy and support for vicarious trauma among staff.  Trauma champion practice consultant. | Staff training | All staff training.  Three half-day initial mandatory trainings, three 1.5-hour training for new hires.  Weekly staff meetings and pre-clinic meetings.  Outside trainer attends once a month to discuss trauma with staff.  Trauma champion clinical social worker. | | All staff training with mandatory initial training.  New Critical Incident Management Team to counsel practices after traumatic event (e.g., a shooting).  Quarterly learning collaboratives for teams.  Role-specific, in-person trainings led by therapists.  Relaxation hotline for staff. | All-staff training with mandatory initial training.  All-staff meetings.  Mindfulness and yoga classes for staff.  2 hours a month for staff self-care.  An “Undoing Racism” committee.  Reflective supervision. | | Staff supervision sessions with a trauma specialist counsellor.  Self-care for staff. | Trauma champion in each team.  Hiring practices.  All staff training including self-care and well-being, specialised training for staff wishing to deliver trauma-responsive and trauma-specific services.  Staff wellbeing days.  Trauma-informed supervision, clinical supervision. | **8** |
| **8. Progress monitoring and quality assurance** | Not reported | Trauma champion assisted staff to evaluate the progress and adjust the plan. | The Behavioral Health Vital Signs (BHVS) performance metric, BHVS screening tool and quality improvement process.  Data visualisation dashboards for tracking progress and a monthly meeting for clinics to share best practices.  Electronic health record templates and data. | Stakeholder group provides feedback.  Ongoing monitoring and evaluation. | | Tracking progress by interviewing or surveying staff. | Tracking progress by interviewing or surveying staff. | | Solicit feedback from service users.  Regular staff check in with management.  Annual planning days that encourage staff feedback. | Monthly meetings of the organisation wide reflective group focussed on the question – How trauma informed are we? | **7** |
| **9. Financing** | Grant from SAMHSA. | Grant from the Canadian Institute of Health Research, each clinic received $10,000 for 24 months. | Federal funds for on-site behavioural health clinicians.  Incentivised performance metrics for depression and alcohol and substance abuse disorders.  ARISE grant. | 24-month grant from the Robert Wood Johnson Foundation. | | | | | Medicare bulk billing and partnership with community youth-oriented services.  Free for patients. | Grants from the National Lottery, fundraising. | **8** |
| **10. Evaluation** | 12-month quantitative study | 24-month mixed methods study | Quantitative evaluation of the quality improvement programme | Cross-sectional qualitative service evaluation | | | | | Cross-sectional qualitative service evaluation | Cross-sectional qualitative service evaluation.  Lived experience forums, feedback opportunities in group work, comments box in the centre. | **8** |
| **Domains, n** | **7** | **10** | **9** | **8** | **6** | | | **7** | **10** | **9** |  |

Note. Studies listed in chronological order. SAMHSA, the Substance Abuse and Mental Health Services Administration. ACEs, adverse childhood experiences.
