# Supplementary material for: Trauma-Informed Approaches in Primary Healthcare and Community Mental Healthcare: A Mixed Methods Systematic Review of Organisational Change Interventions
Source: Hindawi journal article supplement (doi:10.1155/2023/4475114), 2023-05-11
Supplement: f1 [file 4475114.f1.zip › Supplementary material S4.docx]

**Supplementary material S4**

Table S4. Methodological quality of included studies.

| **Study ID, reports** | **Screen** | | **Qualitative** | | | | | **Quantitative** | | | | | **Mixed methods** | | | | | **Total** |
| --- | --- | --- | --- | --- | --- | --- | --- | --- | --- | --- | --- | --- | --- | --- | --- | --- | --- | --- |
| **S1** | **S2** | **1.1** | **1.2** | **1.3** | **1.4** | **1.5** | **3.1** | **3.2** | **3.3** | **3.4** | **3.5** | **5.1** | **5.2** | **5.3** | **5.4** | **5.5** | **%Yes** |
| Browne 2018 [45, 49, 51] | Yes | Yes | Yes | Yes | Yes | Yes | Yes | Yes | Yes | Yes | Yes | Yes | Yes | Yes | Yes | No | Cannot tell | 88 |
| Kimberg 2019 [50] | No | Cannot tell | NA | NA | NA | NA | NA | Yes | Yes | No | No | Cannot tell | NA | NA | NA | NA | NA | 29 |
| Dubay 2018 [48] | Yes | Yes | Yes | Yes | Yes | Yes | Yes | NA | NA | NA | NA | NA | NA | NA | NA | NA | NA | 100 |
| Brooks 2018 [42-44] | Yes | Yes | Yes | Yes | Yes | Yes | Yes | NA | NA | NA | NA | NA | NA | NA | NA | NA | NA | 100 |
| Bradley 2020 [41] | Yes | Yes | Yes | Yes | Yes | Yes | Yes | NA | NA | NA | NA | NA | NA | NA | NA | NA | NA | 100 |
| McHugo 2005 [47, 52, 53] | Yes | Yes | NA | NA | NA | NA | NA | Yes | Yes | Yes | Cannot tell | Cannot tell | NA | NA | NA | NA | NA | 71 |
