# Supplementary material for: Trauma-Informed Approaches in Primary Healthcare and Community Mental Healthcare: A Mixed Methods Systematic Review of Organisational Change Interventions
Source: Hindawi journal article supplement (doi:10.1155/2023/4475114), 2023-05-11
Supplement: f1 [file 4475114.f1.zip › Supplementary material S5.docx]

**Supplementary material S5**

Table S5. Methodological quality for the overall study design, data collection and analysis

| **The Mixed Methods Appraisal Tool questions** | **Yes** | | **No** | | **Cannot tell** | | **Total assessed** | |
| --- | --- | --- | --- | --- | --- | --- | --- | --- |
| **N** | **%** | **N** | **%** | **N** | **%** | **N** | **%** |
| **Screening questions**  S1. Are there clear research questions? | 5 | 83 | 1 | 17 | 0 | 0 | 6 | 100 |
| S2. Do the collected data allow to address the research questions? | 5 | 83 | 0 | 0 | 1 | 17 | 6 | 100 |
| **Qualitative study component**   - 1. Is the qualitative approach appropriate to answer the research question? | 4 | 100 | 0 | 0 | 0 | 0 | 4 | 100 |
| - 1. Are the qualitative data collection methods adequate to address the research question? | 4 | 100 | 0 | 0 | 0 | 0 | 4 | 100 |
| - 1. Are the findings adequately derived from the data? | 4 | 100 | 0 | 0 | 0 | 0 | 4 | 100 |
| - 1. Is the interpretation of results sufficiently substantiated by data? | 4 | 100 | 0 | 0 | 0 | 0 | 4 | 100 |
| - 1. Is there coherence between qualitative data sources, collection, analysis and interpretation? | 4 | 100 | 0 | 0 | 0 | 0 | 4 | 100 |
| **Quantitative non-randomised study component**  3.1. Are the participants representative of the target population? | 3 | 100 | 0 | 0 | 0 | 0 | 3 | 100 |
| 3.2. Are measurements appropriate regarding both the outcome and intervention (or exposure)? | 3 | 100 | 0 | 0 | 0 | 0 | 3 | 100 |
| 3.3. Are there complete outcome data? | 2 | 67 | 1 | 33 | 0 | 0 | 3 | 100 |
| 3.4. Are the confounders accounted for in the design and analysis? | 1 | 33 | 1 | 33 | 1 | 34 | 3 | 100 |
| 3.5 During the study period, is the intervention administered (or exposure occurred) as intended? | 1 | 33 | 0 | 0 | 2 | 67 | 3 | 100 |
| **Mixed methods study component**  5.1. Is there an adequate rationale for using a mixed methods design to address the research question? | 1 | 100 | 0 | 0 | 0 | 0 | 0 | 100 |
| 5.2. Are the different components of the study effectively integrated to answer the research question? | 1 | 100 | 0 | 0 | 0 | 0 | 0 | 100 |
| 5.3. Are the outputs of the integration of qualitative and quantitative components adequately interpreted? | 1 | 100 | 0 | 0 | 0 | 0 | 0 | 100 |
| 5.4. Are divergences and inconsistencies between quantitative and qualitative results adequately addressed? | 0 | 0 | 1 | 100 | 0 | 0 | 0 | 100 |
| 5.5. Do the different components of the study adhere to the quality criteria of each tradition of the methods involved? | 0 | 0 | 0 | 0 | 1 | 0 | 0 | 100 |

Note. Methodological quality was appraised with the Mixed Methods Appraisal Tool (MMAT) version 2018. NA not applicable.
