# Supplementary material for: Trauma-Informed Approaches in Primary Healthcare and Community Mental Healthcare: A Mixed Methods Systematic Review of Organisational Change Interventions
Source: Hindawi journal article supplement (doi:10.1155/2023/4475114), 2023-05-11
Supplement: f1 [file 4475114.f1.zip › Supplementary material S6.docx]

**Supplementary material S6**

Table S6. Factors moderating effectiveness of trauma-informed organisational change interventions.

| **Factor theme** | **Definition** | **Discussed by study ID, reports** | **Supporting quote** |
| --- | --- | --- | --- |
| 1. Contextual factors | Hindering or enabling conditions under which trauma-informed organisational change intervention is enacted. | Bradley 2020 [41], Browne 2018 [45, 49, 51], Dubay 2018 [48] | |
| 1.1. Political and economic environments | Governance, financial, payment regulations and health system values. | Bradley 2020 [41], Browne 2018 [45],  Dubay 2018 [48] | 1. “One interviewee said: “Trauma-informed systems is focused on relationships and building or repairing relationships, which takes time and processes. That is part of the work that needs to happen. But at the same time, we all have goals and need to see a certain number of clients, and we all need to process a certain number of contracts, whatever our own department is responsible for.” Clinical staff in three organizations said it was difficult to participate in trauma-informed efforts when most of their day was spent seeing patients and the business model of the organization depends on revenues from treating patients.” [48]  2. “Staff members realized that their organizational mandates to pay attention to equity were somewhat ‘out of step’ with values driving the larger health care system, and that the positioning of the clinics within the wider health care system limited their possibilities to provide EOHC [equity-oriented health care]” [45] |
| 1.2. Wider trauma-informed movement | Parallel trauma-informed initiatives in the community, health system. | Browne 2018 [51] | 3. “Participants noted the amplifying influence of other trauma-informed initiatives in the community, with one saying: “There’s been lots of information and training within the community, the community organizations just like us and I think that it’s making a difference in how we work. (601, Counselor)” [51] |
| 1.3. Organisational culture | Organisational values, psychological environment, leadership style, receptiveness to principles of trauma-informed care. | Browne 2018 [45, 51], Dubay 2018 [48] | 4. “I’m not convinced that administration has any concept of how swamped we’re all feeling. This lack of communication from the board, and this is what I’m hearing, and I’m kind of seeing it, this lack of involvement from the board has caused … low morale. Sometimes I feel like there’s a bit of a disconnect between the primary care providers, like what happens down here, like providing care for the patients, and then what goes on upstairs [in the administration area]?” [45]  5. “One primary care physician observed cultural differences between her professional field and the behavioral health care field, which she believed explained why some primary care staff were less interested in some self-care activities. This interviewee felt that primary care staff did not have the luxury of thinking about things like yoga because they already had enough trouble making time to eat lunch, with their hectic work schedules. A behavioral health provider at another organization agreed: “Medical doctors are funny people. There’s not a lot of self-care. In the mental health world, we talk about self-care all the time. In the medical world, it seems far less talked about.” [48]  6. “organizational hierarchy was a barrier to becoming trauma-informed. Hierarchy challenges varied across respondents and organizations and included lack of racial diversity in leadership roles and hiring practices; power dynamics among physicians, therapists, nurses, and medical assistants; inconsistent supervisory support to give voice and innovate around trauma-informed efforts; and insufficient incorporation of patient voices, needs, and requests into the practice.” [48]  7. “Multiple participants described how their particular clinic context helped or hindered their efforts at TVIC [trauma- and violence-informed care]. Clinic mandates and culture often aligned with TVIC concepts. However, the extent to and ways in which TVIC was taken up in each clinic was influenced by the existing interprofessional culture, tensions and power dynamics. One leader described how the culture in her team supported TVIC practice: We have a work environment that allows us to be supportive of each other so that we can have the emotional reserves to be able to provide trauma informed care. I think we’re flexible: if you have somebody that comes in that’s in a particular trauma or crisis, our colleagues are always really good about accommodating that time. (502, Administrator)” [51] |
| 1.4. Organisational resources | Facility characteristics and material conditions for trauma-informed organisational changes. | Bradley 2020 [41] | 8. “The Women’s Centre is based in a listed building and as such, it is acknowledged that renovations to the physical space may not be straight forward.” [41] |
| 1.5 Patient characteristics | Individual patient characteristics that hindered or facilitated intervention effects. | Browne 2018 [49] | 9. Patient “financial strain and experiences of discrimination had significant negative effects on all health outcomes.” [49] |
| 2. Intervention factors | Hindering or enabling factors in the intervention design and implementation process. | Bradley 2020 [41], Brooks 2017 [42], Dubay 2018 [48], Browne 2018 [51], McHugo 2005 [53] | |
| 2.1. Implementation process | Barriers and enablers to intervention application: staff engagement in intervention activities, funding for organisational change. | Bradley 2020 [41], Brooks 2017 [42], Dubay 2018 [48], Browne 2018 [51] | 10. “Another barrier was resistance or pushback from subsets of staff (which varied by organization but often spanned many staff levels), both during and after trainings, to changes such as increasing the use of an ACEs [Adverse Childhood Experiences] screening questionnaire and participating in staff self-care strategies such as meditation and yoga classes.” [48]  11. “most organizations relied on funding from this and other grants to implement and enhance their trauma-informed efforts; these opportunities may not be available to all organizations or providers.” [48] |
| 2.2. Staff education | Barriers and enablers for staff education: interactive learning, buy-in from leadership, all staff, accessibility | Dubay 2020 [48], Browne 2018 [51] | 12. “A key finding in this study was that staff at both clinics found the interprofessional conversations more impactful than the didactic education. These conversations provided staff with the opportunity to learn together, to learn about one another’s perspectives on violence and trauma in their practices, and to take a level of collaborative action together that was unprecedented.” [51]  13. “Staff at nearly all organizations felt that leadership buy-in was one of the most important elements and that when leadership did not believe in the value of a training, neither would staff from that organization. And for trainings to happen, leadership needed to believe that they were worth the money and time away from patient care. At some organizations, only a limited number of staff were excused from clinical duties to attend some trainings, which obviously limited the reach of these trainings.” [48] |
| 2.1. Intervention components | Intervention components that modified intervention effect: integrated services, varied services, equal attention to supporting patients and staff. | Bradley 2020 [41], McHugo 2005 [53] | 14. “Analysis of key program elements demonstrated that integrating substance abuse, mental health, and trauma-related issues into counseling yielded greater improvement, whereas the delivery of numerous core services yielded less improvement relative to the comparison group.” [53]  17. “One member of staff emphasised the importance of prioritising staff well-being as equal to the support provided to women.” [41] |
